# Supplementary material for: Photophysical properties of quinoxaline-fused [7]carbohelicene derivatives
Source: Royal Society of Chemistry journal article supplement (doi:10.1039/c5ra12577d), 2015-01-01
Supplement: c5ra12577d1.pdf [file c5ra12577d1.pdf]

# **Photophysical properties of quinoxaline-fused [7]carbohelicene derivatives**

**Chunyu Liu,<sup>a</sup> Yanling Si,<sup>b</sup> Xiumei Pan<sup>a,\*</sup> and Guochun Yang<sup>a,\*</sup>**

- a. Institute of Functional Material Chemistry, Faculty of Chemistry, Northeast Normal University, Changchun  
130024 Jilin, China.  
E-mail: yanggc468@nenu.edu.cn
- b. College of Resource and Environmental Science, Jilin Agricultural University,  
Changchun, 130118 Jilin, China

# Contents

1. The main concerned bond length for compound **4** between experiment and calculation. **S3**
2. Computed absorption wavelengths (nm) using the B3LYP functional at the different basis sets level for compound **2**. **S4**
3. Calculated UV-Vis (left) and CD (right) spectra of compound **2** using six different DFT functionals. **S5**
4. Computed HOMO and LUMO energy level and corresponding energy gaps ( $E_g=LUMO-HOMO$ ) in eV using different functionals at 6-31+G(d) basis set level for compound **2**. **S6**
5. The calculated excitation energies, oscillator strengths and rotational strengths for compound **2** in the gas phase at the TDB3LYP/ 6-31+G(d) level. **S7**
6. Computed absorption wavelengths ( $\lambda$  in nm), oscillator strengths ( $f$ ), and major contribution for the studied compounds **1, 3, 4, 5** and **6**. **S9**
7. Calculated UV-Vis (left) and CD (right) spectra in solution phases(THF) of **1** and **3** at the TDB3LYP/6-31+G(d) level of theory along with gas phases UV-Vis and CD (red dash line). **S10**
8. Molecular orbital isosurfaces involved in the main electron transitions of compounds **1, 3, 4** and **6** at the TDB3LYP/6-31+G(d) level of theory. **S11**
9. Computed HOMO and LUMO energy level and corresponding energy gaps ( $E_g$ ) in eV at the TDB3LYP/6-31G(d,p) level for compounds **1-6**. **S13**
10. Molecular orbitals involved into the main CD transition of compounds **1-4**. **S14**
11. Calculated band structure of the crystal for compound **4** in its racemate (top) and enantiomer crystals (bottom). **S16**

**Table S1.** The main concerned bond length for compound **4** between experiment and calculation.

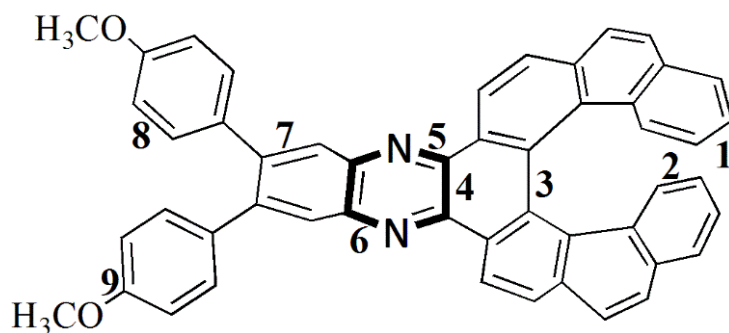

| Bond | B3LYP | Experiment | Difference |
|------|-------|------------|------------|
| 1    | 1.407 | 1.405      | 0.002      |
| 2    | 1.382 | 1.379      | 0.003      |
| 3    | 1.479 | 1.479      | 0.000      |
| 4    | 1.439 | 1.438      | 0.001      |
| 5    | 1.330 | 1.333      | -0.003     |
| 6    | 1.352 | 1.355      | -0.003     |
| 7    | 1.383 | 1.369      | 0.014      |
| 8    | 1.397 | 1.377      | 0.020      |
| 9    | 1.365 | 1.370      | 0.005      |

**Note:** the difference is equal to calculation value minus experimental value

**Table S2.** Computed absorption wavelengths (nm) using the B3LYP functional at the different basis sets level for compound **2** along with the experimental values.

| Basis set       | Band 1 | Band 2 | Band 3 | Band 4 |
|-----------------|--------|--------|--------|--------|
| 6-31G(d)        | 278.90 | 313.25 | 341.40 | 419.99 |
| 6-31+G(d)       | 282.49 | 316.45 | 346.13 | 424.85 |
| 6-31++G(d,p)    | 282.74 | 316.54 | 346.24 | 424.78 |
| 6-311++G(d,p)   | 283.80 | 317.94 | 348.20 | 426.72 |
| 6-311++G(2d,2p) | 284.42 | 318.48 | 349.18 | 427.27 |
| exp             | 276    | 332    | 366    | 427    |

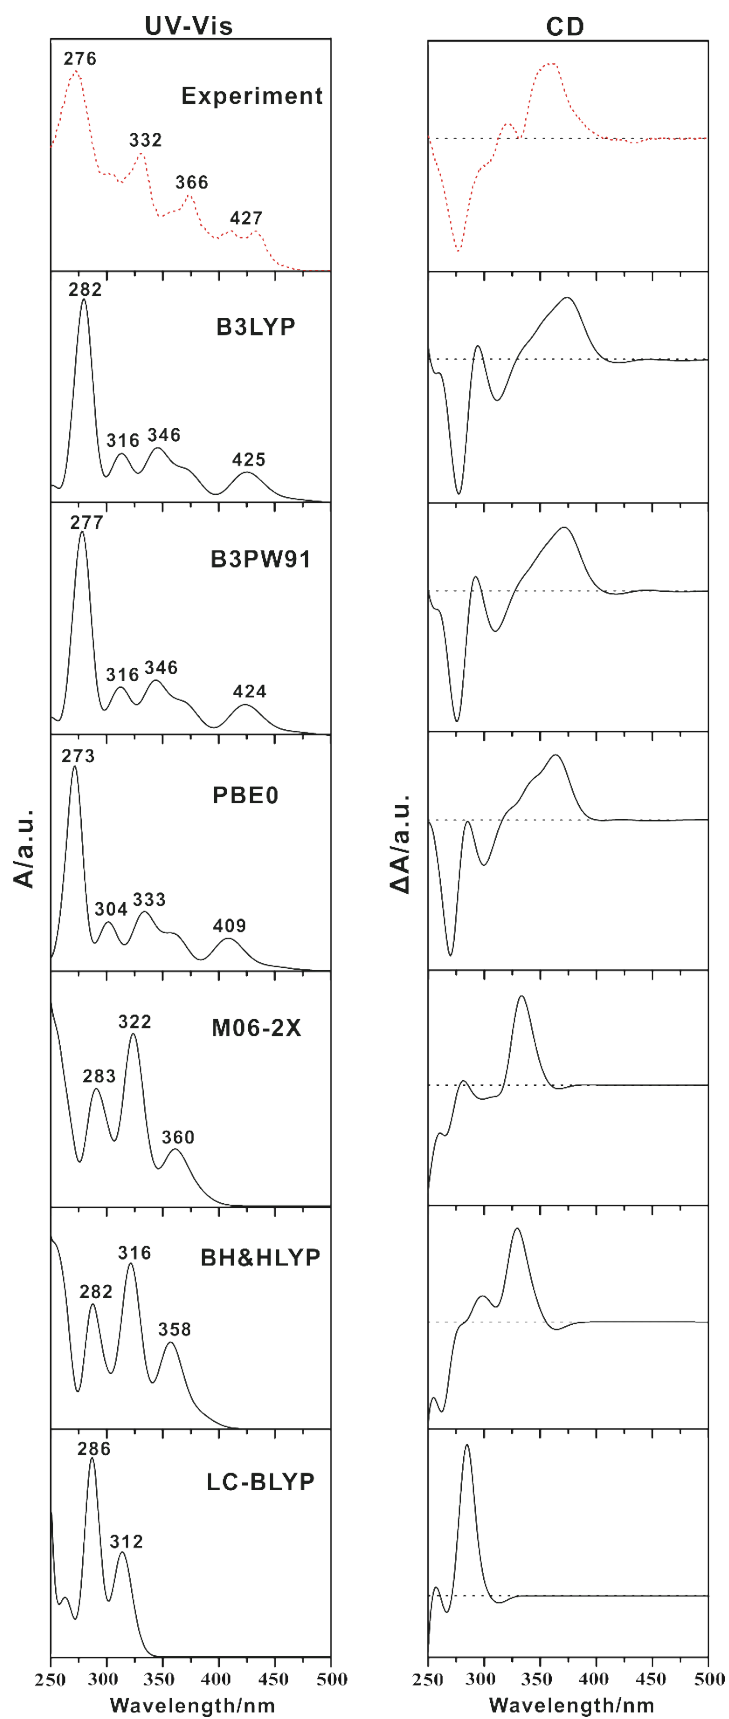

**Figure S1.** Calculated UV-Vis (left) and CD (right) spectra of compound **2** using six different DFT functionals along with the experimental spectra.

**Table S3.** Computed HOMO and LUMO energy level and corresponding energy gaps ( $E_g$ =LUMO-HOMO) in eV using different functionals at 6-31+G(d) basis set level for compound **2**.

| Functional | HUMO   | LUMO   | $E_g$ |
|------------|--------|--------|-------|
| B3LYP      | -5.757 | -2.574 | 3.183 |
| PBE0       | -5.961 | -2.480 | 3.481 |
| B3PW91     | -5.819 | -2.628 | 3.191 |
| M06-2X     | -6.896 | -1.835 | 5.061 |
| BH&HLYP    | -6.537 | -1.603 | 4.934 |
| LC-BLYP    | -8.226 | -0.481 | 7.745 |

**Table S4.** The calculated excitation energies, oscillator strengths and rotational strengths for compound **2** in the gas phase at the TDB3LYP/ 6-31+G(d) level.

| states | eV     | $\lambda^a$ | $f^b$  | Rlength <sup>c</sup> | Rvelocity <sup>c</sup> |
|--------|--------|-------------|--------|----------------------|------------------------|
| 1      | 2.6440 | 468.92      | 0.0224 | 5.5739               | 5.1048                 |
| 2      | 2.8851 | 429.74      | 0.0112 | -46.2693             | -45.2348               |
| 3      | 2.9183 | 424.85      | 0.1891 | 57.2984              | 54.9835                |
| 4      | 3.2810 | 377.88      | 0.0005 | -0.0633              | -0.2286                |
| 5      | 3.2991 | 375.81      | 0.0674 | -308.9714            | -309.9281              |
| 6      | 3.3071 | 374.90      | 0.0693 | 53.0994              | 52.4732                |
| 7      | 3.3946 | 365.23      | 0.0832 | -3.5566              | -3.5030                |
| 8      | 3.4951 | 354.74      | 0.0076 | -126.4121            | -124.9949              |
| 9      | 3.5685 | 347.44      | 0.0692 | -191.9522            | -191.1530              |
| 10     | 3.5820 | 346.13      | 0.2068 | 211.4651             | 205.9730               |
| 11     | 3.6540 | 339.31      | 0.0080 | -46.5211             | -43.4195               |
| 12     | 3.6855 | 336.41      | 0.0844 | -28.7331             | -28.0954               |
| 13     | 3.9180 | 316.45      | 0.2195 | 59.3692              | 57.4197                |
| 14     | 4.0151 | 308.79      | 0.0742 | 78.5611              | 75.1716                |
| 15     | 4.0341 | 307.34      | 0.0435 | 57.8225              | 57.9084                |
| 16     | 4.0579 | 305.54      | 0.0247 | -15.2280             | -15.2438               |
| 17     | 4.1594 | 298.08      | 0.0038 | -10.5911             | -9.6629                |
| 18     | 4.1642 | 297.74      | 0.0044 | 10.5572              | 10.8161                |
| 19     | 4.2477 | 291.88      | 0.0157 | -22.4081             | -22.3610               |
| 20     | 4.2734 | 290.13      | 0.0164 | -78.0292             | -77.1421               |
| 21     | 4.3173 | 287.18      | 0.0047 | -1.8169              | -2.0775                |
| 22     | 4.3442 | 285.40      | 0.0326 | -136.8769            | -133.1782              |
| 23     | 4.3890 | 282.49      | 0.7815 | 259.6704             | 254.5679               |
| 24     | 4.4281 | 280.00      | 0.0078 | 4.4532               | 4.0056                 |
| 25     | 4.4535 | 278.40      | 0.3126 | 298.5076             | 292.8781               |
| 26     | 4.4936 | 275.91      | 0.0988 | -119.4684            | -112.3997              |
| 27     | 4.5204 | 274.28      | 0.0349 | 30.4146              | 30.5501                |
| 28     | 4.5659 | 271.54      | 0.3065 | 229.5874             | 220.4800               |
| 29     | 4.5846 | 270.44      | 0.0369 | -9.2351              | -8.3509                |
| 30     | 4.7298 | 262.14      | 0.0010 | -18.0344             | -19.9286               |
| 31     | 4.7745 | 259.68      | 0.0095 | -46.7129             | -43.8157               |
| 32     | 4.7990 | 258.35      | 0.0031 | 42.5221              | 38.4494                |
| 33     | 4.8537 | 255.44      | 0.0023 | 44.1085              | 44.8482                |
| 34     | 4.8836 | 253.88      | 0.0291 | 4.2786               | 4.0528                 |
| 35     | 4.8861 | 253.75      | 0.0209 | -5.1898              | -4.4951                |
| 36     | 4.9057 | 252.73      | 0.0026 | 31.8721              | 31.3515                |
| 37     | 4.9553 | 250.20      | 0.0466 | -14.3257             | -13.2494               |
| 38     | 4.9798 | 248.97      | 0.0055 | -12.4077             | -12.0278               |
| 39     | 4.9947 | 248.23      | 0.0012 | -15.4280             | -12.0929               |

---

|    |        |        |        |           |           |
|----|--------|--------|--------|-----------|-----------|
| 40 | 5.0903 | 243.57 | 0.0200 | -110.1612 | -106.9509 |
| 41 | 5.1060 | 242.82 | 0.0107 | -3.9865   | -4.1217   |
| 42 | 5.1659 | 240.00 | 0.0041 | 6.5592    | 6.3127    |
| 43 | 5.1684 | 239.89 | 0.0309 | -42.0964  | -39.9093  |
| 44 | 5.2035 | 238.27 | 0.0006 | 1.7824    | 1.9336    |
| 45 | 5.2075 | 238.09 | 0.0000 | -0.1136   | -0.0247   |
| 46 | 5.2152 | 237.73 | 0.0007 | 6.3266    | 4.7656    |
| 47 | 5.2533 | 236.01 | 0.0130 | 31.0118   | 31.8413   |
| 48 | 5.2641 | 235.53 | 0.0003 | 0.7014    | 1.2800    |
| 49 | 5.3123 | 233.39 | 0.0138 | -16.7621  | -16.5259  |
| 50 | 5.3147 | 233.28 | 0.0012 | 1.9467    | 1.7718    |
| 51 | 5.3380 | 232.27 | 0.0001 | 3.3390    | 3.8701    |
| 52 | 5.3414 | 232.12 | 0.0220 | -25.3855  | -23.4324  |
| 53 | 5.3547 | 231.54 | 0.0506 | 4.6474    | 4.4342    |
| 54 | 5.3696 | 230.90 | 0.0169 | 39.5927   | 38.1616   |
| 55 | 5.3933 | 229.88 | 0.0010 | 4.0598    | 3.9349    |
| 56 | 5.4053 | 229.37 | 0.0129 | -18.3724  | -16.9195  |
| 57 | 5.4072 | 229.30 | 0.0052 | -22.3822  | -21.8288  |
| 58 | 5.4309 | 228.29 | 0.0107 | -24.7518  | -24.4644  |
| 59 | 5.4401 | 227.91 | 0.0169 | 2.4085    | 2.4843    |
| 60 | 5.4525 | 227.39 | 0.1216 | -107.9398 | -105.0485 |

---

<sup>a</sup> $\lambda$  in nm. <sup>b</sup> Oscillator Strengths. <sup>c</sup> R values (in  $10^{-40}$  esu<sup>2</sup>cm<sup>2</sup>) using the velocity-gauge representation and length-gauge representation of the electric dipole operator.



**Table S5.** Computed absorption wavelengths ( $\lambda$  in nm) as compared to experimental data (in parentheses), oscillator strengths ( $f$ ), and major contribution for the studied compounds **1**, **3**, **4**, **5** and **6**.

| Compound | $\lambda$   | $f$   | Major contribution                                                     |
|----------|-------------|-------|------------------------------------------------------------------------|
| <b>1</b> | 273.82(272) | 0.509 | HOMO-1 $\rightarrow$ LUMO+3 (44%)<br>HOMO-3 $\rightarrow$ LUMO (13%)   |
|          | 311.91(303) | 0.015 | HOMO-3 $\rightarrow$ LUMO+1 (55%)<br>HOMO-1 $\rightarrow$ LUMO+2 (42%) |
|          | 374.34(373) | 0.104 | HOMO $\rightarrow$ LUMO+1 (59%)<br>HOMO-1 $\rightarrow$ LUMO (25%)     |
| <b>3</b> | 272.71(283) | 0.366 | HOMO-2 $\rightarrow$ LUMO+5 (32%)<br>HOMO-12 $\rightarrow$ LUMO (19%)  |
|          | 301.46(335) | 0.128 | HOMO-1 $\rightarrow$ LUMO+3 (44%)<br>HOMO $\rightarrow$ LUMO+5 (15%)   |
|          | 349.57(378) | 0.640 | HOMO-2 $\rightarrow$ LUMO+1 (39%)<br>HOMO $\rightarrow$ LUMO+1 (29%)   |
|          | 438.13(445) | 0.416 | HOMO-1 $\rightarrow$ LUMO (88%)<br>HOMO $\rightarrow$ LUMO+1 (9%)      |
| <b>4</b> | 276.15(286) | 0.064 | HOMO-12 $\rightarrow$ LUMO (33%)<br>HOMO-8 $\rightarrow$ LUMO+1 (14%)  |
|          | 308.78(333) | 0.251 | HOMO-8 $\rightarrow$ LUMO (51%)<br>HOMO-4 $\rightarrow$ LUMO+2 (16%)   |
|          | 352.72(383) | 0.573 | HOMO $\rightarrow$ LUMO+2 (51%)<br>HOMO-1 $\rightarrow$ LUMO+1 (22%)   |
|          | 449.65(450) | 0.571 | HOMO-1 $\rightarrow$ LUMO (93%)                                        |
| <b>5</b> | 287.72      | 0.478 | HOMO-1 $\rightarrow$ LUMO+5 (48%)<br>HOMO-2 $\rightarrow$ LUMO+4 (15%) |
|          | 312.87      | 0.302 | HOMO-8 $\rightarrow$ LUMO (34%)<br>HOMO $\rightarrow$ LUMO+3 (31%)     |
|          | 359.21      | 0.579 | HOMO-1 $\rightarrow$ LUMO+2 (52%)<br>HOMO $\rightarrow$ LUMO+1 (17%)   |
|          | 476.34      | 0.533 | HOMO $\rightarrow$ LUMO (96%)                                          |
| <b>6</b> | 285.74      | 0.408 | HOMO $\rightarrow$ LUMO+7 (46%)<br>HOMO-1 $\rightarrow$ LUMO+5 (12%)   |
|          | 348.46      | 0.498 | HOMO-2 $\rightarrow$ LUMO+3 (57%)<br>HOMO $\rightarrow$ LUMO+3 (14%)   |
|          | 456.00      | 0.412 | HOMO $\rightarrow$ LUMO+1 (64%)<br>HOMO-1 $\rightarrow$ LUMO (34%)     |

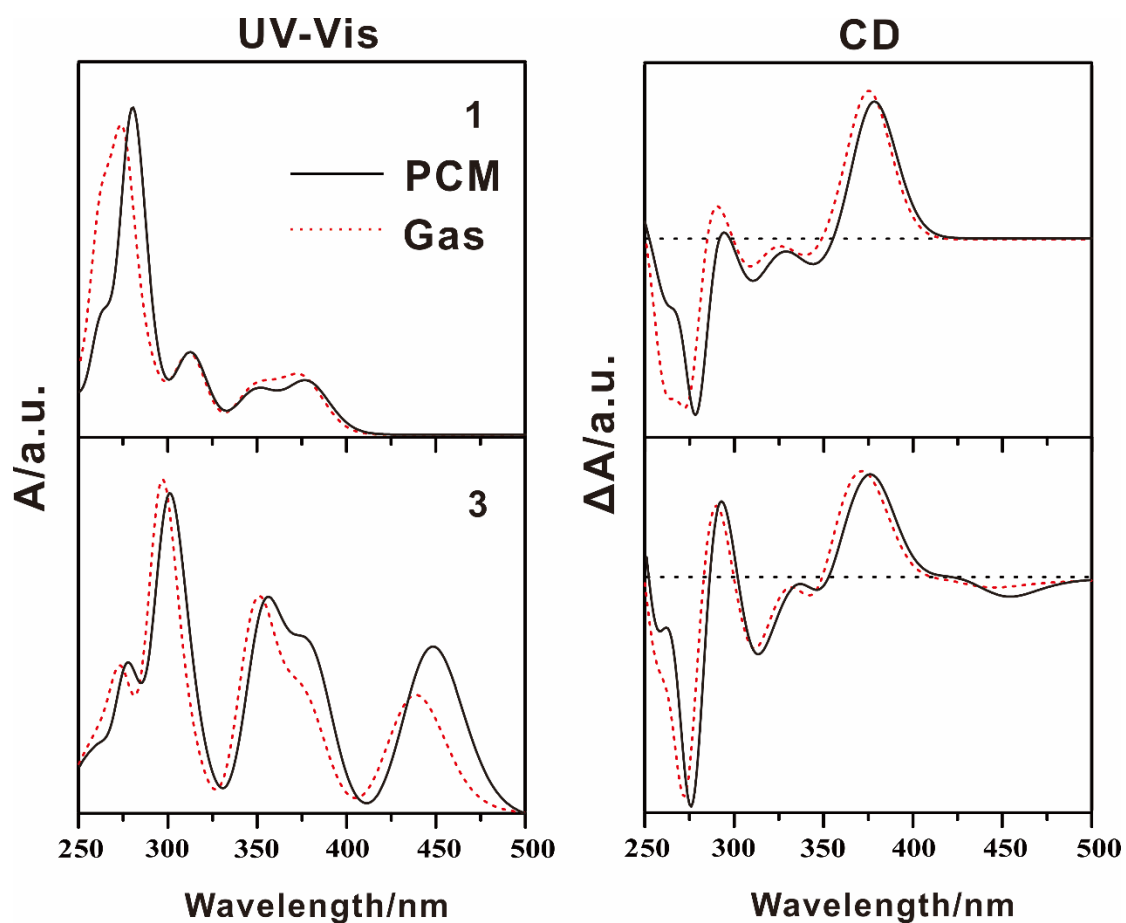

**Figure S2.** Calculated UV-Vis (left) and CD (right) spectra in solution phases(THF) of **1** and **3** at the TDB3LYP/6-31+G(d) level of theory along with gas phases UV-Vis and CD (red dash line).

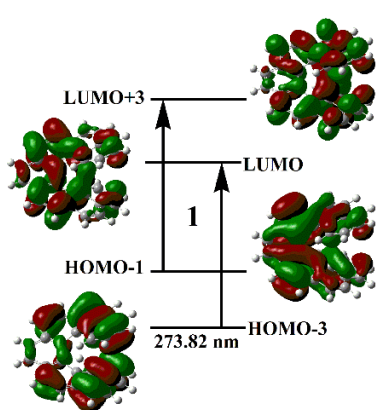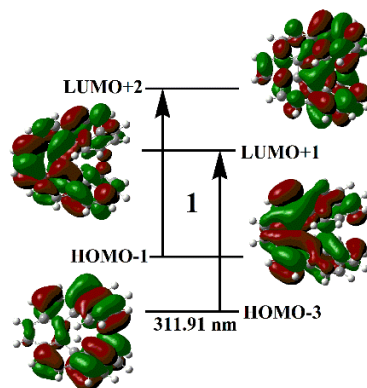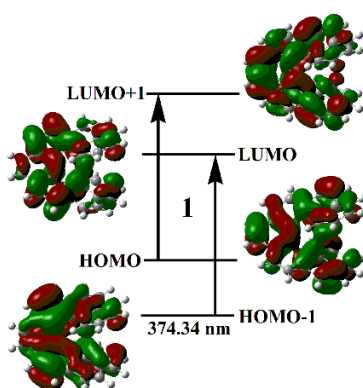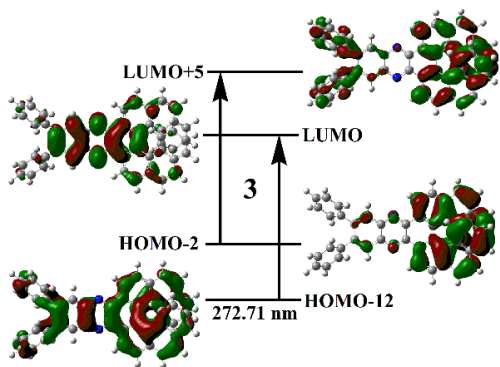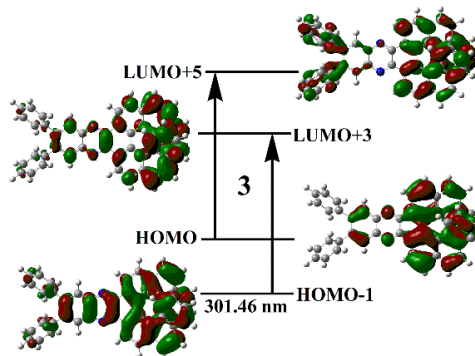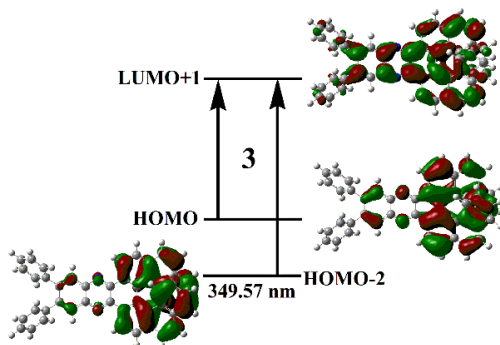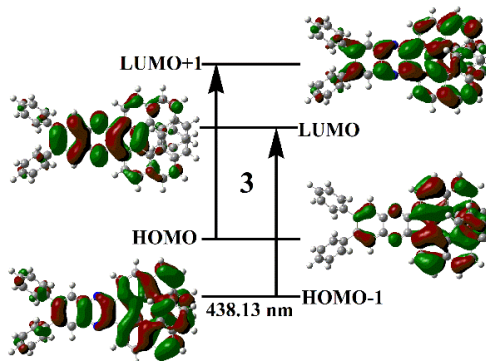

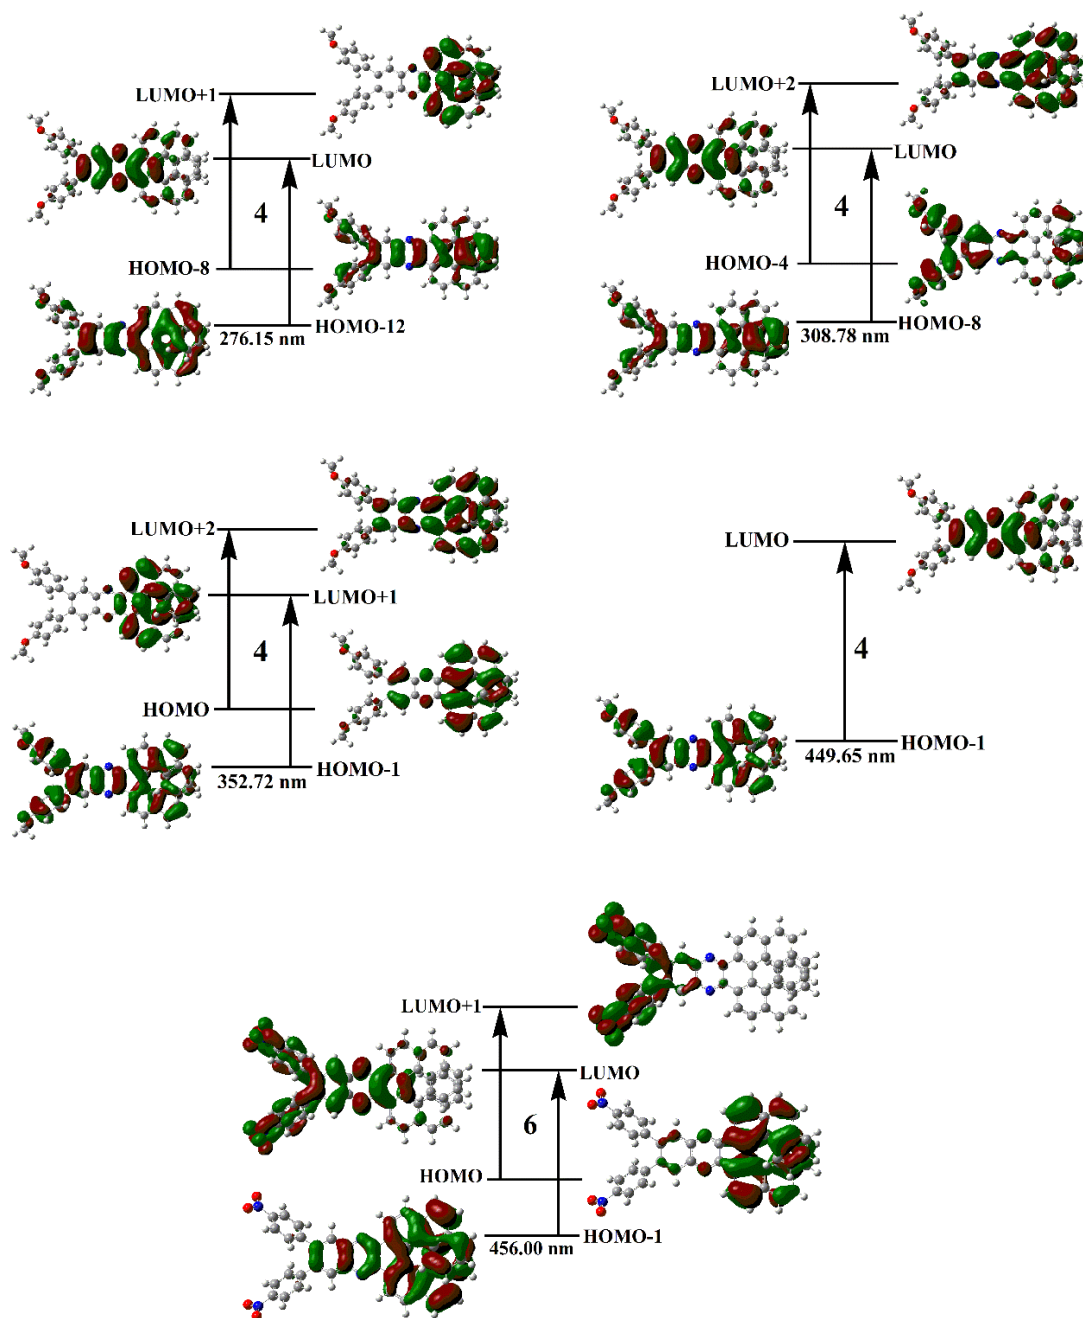

**Figure S3.** Molecular orbital isosurfaces involved in the main electron transitions of compounds **1**, **3**, **4** and **6** at the TDB3LYP/6-31+G(d) level of theory.

**Table S6.** Computed HOMO and LUMO energy level and corresponding energy gaps

( $E_g$ =LUMO-HOMO) in eV at the TDB3LYP/6-31G(d,p) level for compounds 1-6.

| Compound | HOMO   | LUMO   | $E_g$ |
|----------|--------|--------|-------|
| 1        | -5.371 | -1.508 | 3.863 |
| 2        | -5.484 | -2.272 | 3.212 |
| 3        | -5.454 | -2.295 | 3.159 |
| 4        | -5.377 | -2.198 | 3.179 |
| 5        | -5.114 | -2.099 | 3.015 |
| 6        | -5.767 | -2.844 | 2.923 |

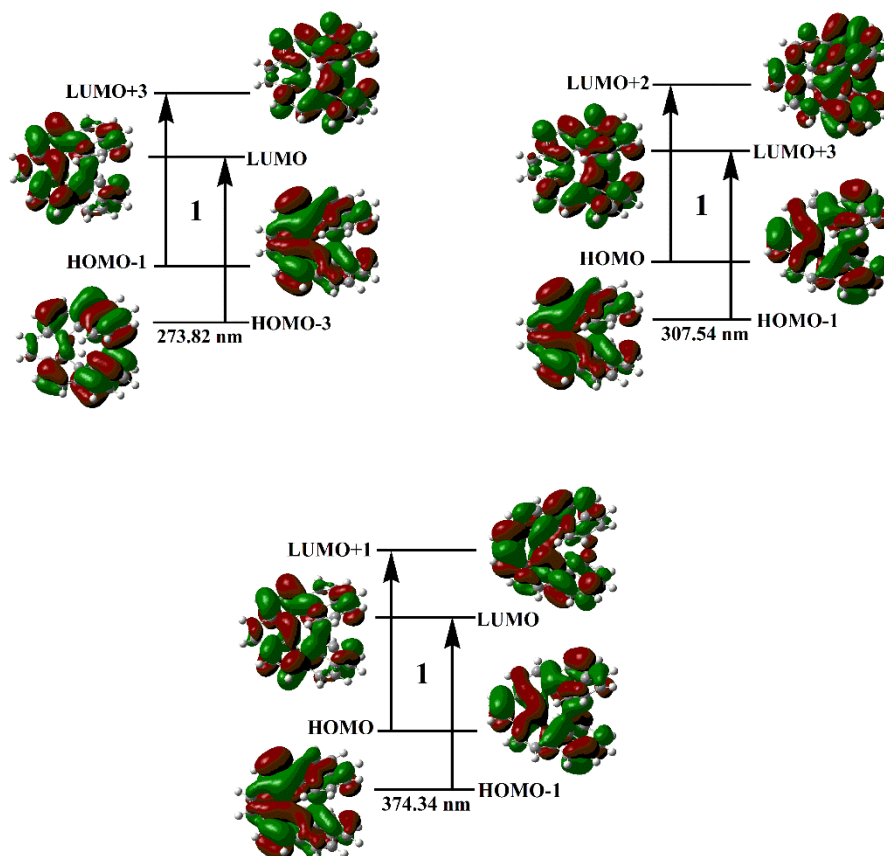

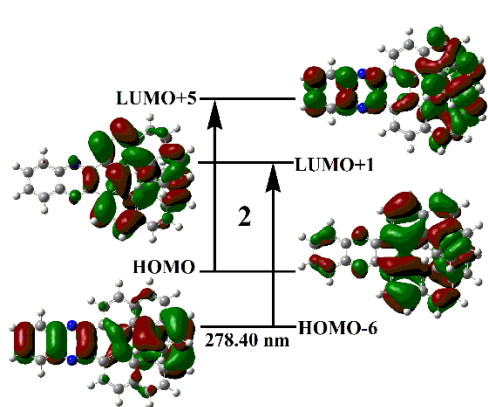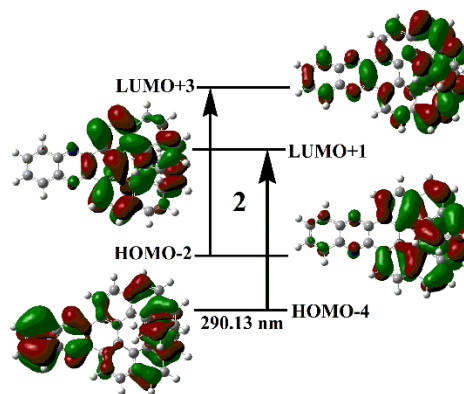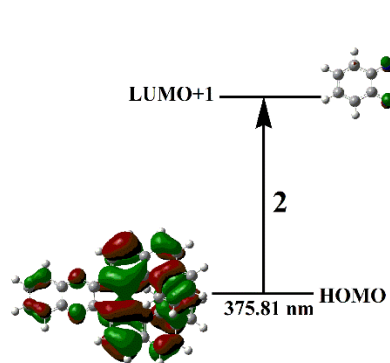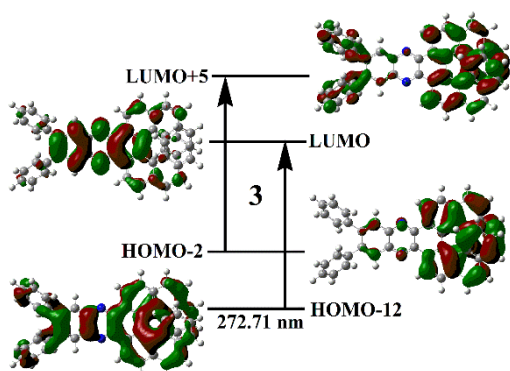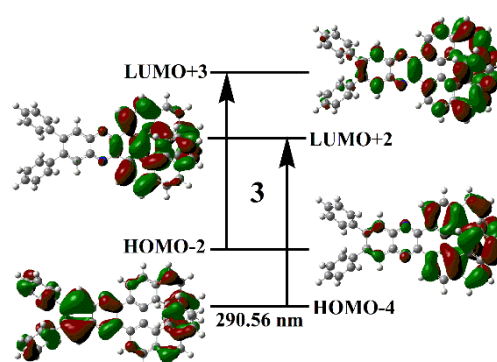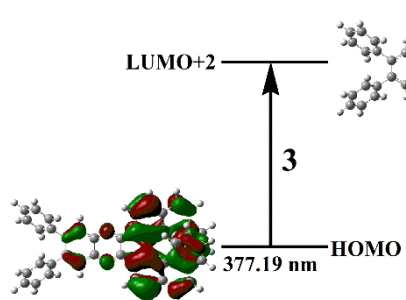

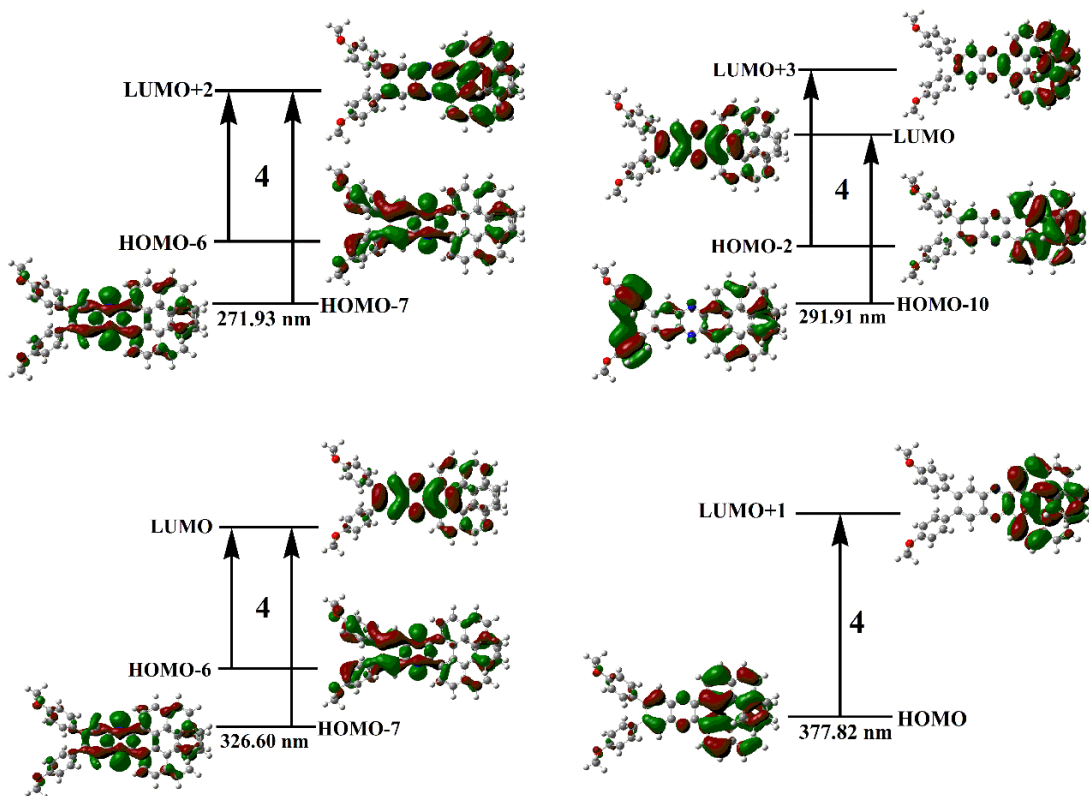

**Figure S4.** Molecular orbitals involved into the main CD transition of compounds 1-4.

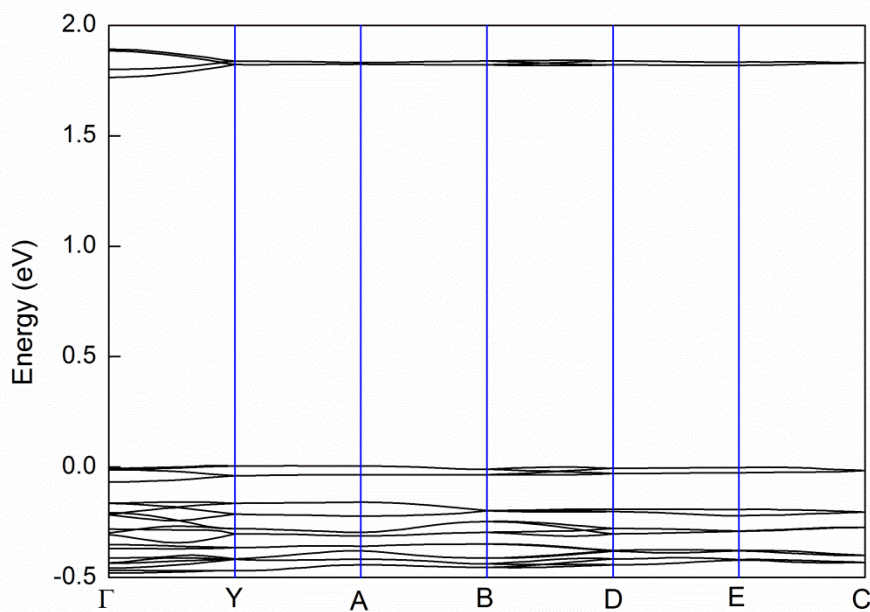



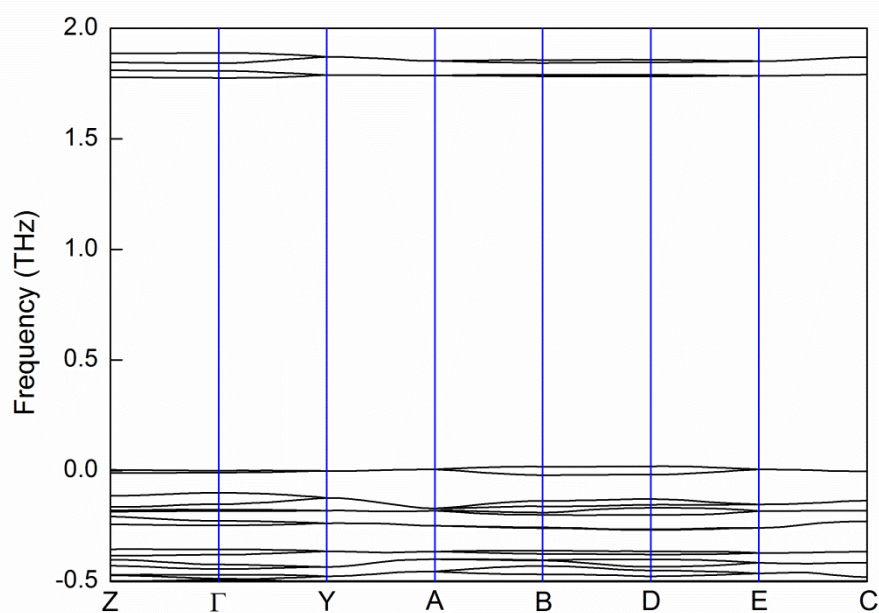

**Figure S5.** Calculated band structure of the crystal for compound **4** in its racemate (top) and enantiomer crystals (bottom). The high symmetry points in racemate are  $\Gamma = (0, 0, 0)$ ,  $Y = (0, 0.5, 0)$ ,  $A = (-0.5, 0.5, 0.5)$ ,  $B = (-0.5, 0, 0)$ ,  $D = (-0.5, 0, 0.5)$ ,  $E = (-0.5, 0.5, 0.5)$  and  $X = (0, 0.5, 0.5)$ . The high symmetry points in enantiomer crystals are  $Z = (0, 0, 0.5)$ ,  $\Gamma = (0, 0, 0)$ ,  $Y = (0, 0.5, 0)$ ,  $A = (-0.5, 0.5, 0.5)$ ,  $B = (-0.5, 0, 0)$ ,  $D = (-0.5, 0, 0.5)$ ,  $E = (-0.5, 0.5, 0.5)$  and  $X = (0, 0.5, 0.5)$ .
